# Supplementary material for: Metabolic syndrome is associated with and predicted by resting heart rate: a cross-sectional and longitudinal study
Source: HighWire-hosted journal article supplement (doi:10.1136/heartjnl-2014-305685), 2014-09-01
Supplement: heartjnl-2014-305685supp.pdf [file heartjnl-2014-305685supp.pdf]

Supplement Table 1 Adjusted odds ratio of having metabolic syndrome according to resting heart rate in cross-sectional study in 2006

| Heart Rate<br>Range (bpm) | 45-54           | 55-64       | 65-74           | 75-84           | 85-94           | 95-104          | P trend |
|---------------------------|-----------------|-------------|-----------------|-----------------|-----------------|-----------------|---------|
| No of cases (%)           | 181(14.26)      | 2572(19.67) | 9001(24.08)     | 8021(28.60)     | 2438(32.69)     | 937(35.53)      |         |
| Model 1                   | 0.63(0.54-0.74) | reference   | 1.36(1.29-1.43) | 1.76(1.67-1.85) | 2.12(1.99-2.27) | 2.30(2.10-2.52) | <0.0001 |
| Model 2                   | 0.63(0.53-0.74) | reference   | 1.35(1.29-1.43) | 1.77(1.68-1.86) | 2.14(2.00-2.28) | 2.31(2.12-2.54) | <0.0001 |
| Model 3                   | 0.71(0.58-0.88) | reference   | 1.10(1.03-1.18) | 1.33(1.24-1.42) | 1.44(1.32-1.57) | 1.50(1.32-1.70) | <0.0001 |
| Model 4                   | 0.72(0.58-0.88) | reference   | 1.10(1.03-1.18) | 1.33(1.24-1.42) | 1.45(1.33-1.58) | 1.50(1.32-1.70) | <0.0001 |
| Model 5                   | 0.72(0.58-0.88) | reference   | 1.10(1.04-1.19) | 1.33(1.24-1.42) | 1.45(1.32-1.58) | 1.49(1.32-1.69) | <0.0001 |

Model 1: adjusted for age and sex; Model 2: further adjusted for education, smoking, alcohol drinking and physical activities; Model 3: further adjusted for BMI, hypertension, diabetes and hyperlipidemia (triglycerides, high density lipoprotein-cholesterol, low density lipoprotein-cholesterol, total cholesterol); Model 4: further adjusted for CRP; Model 5: further adjusted for creatinine.

Supplement Table 2 Adjusted odds ratio of newly developed metabolic syndrome according to resting heart rate after 4-year follow-up

| Heart Rate<br>Range (bpm) | 45-54           | 55-64       | 65-74           | 75-84           | 85-94           | 95-104          | P trend |
|---------------------------|-----------------|-------------|-----------------|-----------------|-----------------|-----------------|---------|
| No of cases (%)           | 164(23.30)      | 1984(28.14) | 5811(30.46)     | 4163(32.62)     | 1039(33.56)     | 366(35.36)      |         |
| Model 1                   | 0.77(0.64-0.93) | reference   | 1.12(1.06-1.19) | 1.25(1.17-1.33) | 1.31(1.19-1.43) | 1.42(1.23-1.62) | <0.0001 |
| Model 2                   | 0.77(0.64-0.94) | reference   | 1.13(1.06-1.20) | 1.18(1.10-1.27) | 1.32(1.20-1.43) | 1.43(1.24-1.65) | <0.0001 |
| Model 3                   | 0.81(0.66-0.99) | reference   | 1.08(1.01-1.15) | 1.18(1.10-1.27) | 1.25(1.13-1.38) | 1.45(1.24-1.69) | <0.0001 |
| Model 4                   | 0.81(0.66-0.99) | reference   | 1.08(1.00-1.15) | 1.18(1.10-1.27) | 1.24(1.12-1.37) | 1.45(1.24-1.69) | <0.0001 |
| Model 5                   | 0.80(0.66-0.98) | reference   | 1.08(1.01-1.16) | 1.17(1.09-1.25) | 1.22(1.10-1.35) | 1.41(1.21-1.65) | <0.0001 |

Model 1: adjusted for age and sex; Model 2: further adjusted for education, smoking, alcohol drinking and physical activities; Model 3: further adjusted for BMI, hypertension, diabetes and hyperlipidemia (triglycerides, high density lipoprotein-cholesterol, low density lipoprotein-cholesterol, total cholesterol); Model 4: further adjusted for CRP; Model 5: further adjusted for creatinine.
